# Supplementary material
Source: PubMed Central journal article supplement (PMC4134417)
Supplement: NIHMS594189-supplement-Online_Supplement.pdf [file NIHMS594189-supplement-Online_Supplement.pdf]

## ONLINE SUPPLEMENT

### **Epigenetic Up-regulation of Large-Conductance Ca<sup>2+</sup>-Activated K<sup>+</sup> Channel Expression in Uterine Vascular Adaptation to Pregnancy**

By

Man Chen, Chiranjib Dasgupta, Fuxia Xiong and Lubo Zhang

Center for Perinatal Biology, Division of Pharmacology, Department of Basic Sciences, Loma  
Linda University School of Medicine, Loma Linda, CA, 92350

**Running title:** Epigenetic regulation of BK<sub>Ca</sub> channel expression

**Author for correspondence:**

Lubo Zhang, Ph.D.  
Center for Perinatal Biology  
Division of Pharmacology  
Department of Basic Sciences  
Loma Linda University  
School of Medicine  
Loma Linda, CA 92350  
Tel: 909-558-4325  
Fax: 909-558-4029  
Email: [lzhang@llu.edu](mailto:lzhang@llu.edu)

**Table S1. Primers used in quantitative methylation-specific PCR**

| <b>Primer Name</b>       | <b>Primer sequence (5'→3')</b> | <b>Orientation</b> | <b>Status</b> |
|--------------------------|--------------------------------|--------------------|---------------|
| SP1 <sub>-380</sub> UMF  | GGGTTTTGGTTGTTGGGT             | Forward            | U             |
| SP1 <sub>-380</sub> UMR  | ATTTCTTCTTCACTTAATCTCTCTAAAC   | Reverse            | U             |
| SP1 <sub>-380</sub> MF   | GGGTTTTGGTTGTTGGGC             | Forward            | M             |
| AP1 <sub>-652</sub> UMF  | AGTTTGTTTGGTTTAGTGATTTTTT      | Forward            | U             |
| AP1 <sub>-652</sub> UMR  | TTTTAATCCTTCCAACAACCAC         | Reverse            | U             |
| AP1 <sub>-652</sub> MF   | AGTTTGTTTGGTTTAGTGATTTTTTC     | Forward            | M             |
| AP1 <sub>-879</sub> UMF  | GAGTTTTAGATTTAGTTTTTTTAATTGATT | Forward            | U             |
| AP1 <sub>-879</sub> UMR  | CATAACTTCTCTCTACTCTTTCATC      | Reverse            | U             |
| AP1 <sub>-879</sub> MF   | GAGTTTTAGATTTAGTTTTTTTAATTGATC | Forward            | M             |
| AP1 <sub>-1197</sub> UMF | AATTTGGTAGGATTCGTTTTGAT        | Forward            | U             |
| AP1 <sub>-1197</sub> UMR | CTCCTCTATCCATAAAATTCTCC        | Reverse            | U             |
| AP1 <sub>-1197</sub> MF  | AATTTGGTAGGATTCGTTTTGAC        | Forward            | M             |

F, forward; R, reverse; M, methylated; U, unmethylated.

GCTAGCCCTCCCCTCTATAAAAGGGGTAGGACGAGCTCTACCTGAATATGACTGTGAGCCTGCAGTGCTTATTACGTTATGGG  
 GTTTTTGAAGTTTGAAGTCAGGCAAGCAGTTTTGTGATCTCTAACCCCTCTGTGCCAACGCAGAACACCAGTCTTTATCAGTGT  
 AACATCGTTGTTTCCTTCCTTCCTACAATCATCTGCCCCACACGAACCCACAGCCAGCCAGGGAGCAGGGTTTCCACCCG  
 CATACCCTCAAGAGACAGGCATGTCAAAGCATTGTTGGCAAGAGTTGCTTCGATGCAGCAGAAAGATATACCAGCCCTGTCT  
 GTTCCCATTTTCCAAGGGGAGAATACTTGGGAAGAAGGCTTGTGTTGCTTATAAAGTCCAATGTGTAACCTCCTAATACCTTTA  
 GTCAGTTACAAGCATGTAGCCCTTTAGCCATACTTTAAAAGACTGTCTGTTGTAAGTACTGAGGGTCTCTCCCCGAAAGGAGAAAG  
 AAGGATTTTTGCACTAGATCACAGGCAGGGATCTTCTGGCTCCTGCGTGGGCCAGGACCATCTTGGAAAATCACCCCTCTGGG  
 ATTCATTCTTGGCCATGTCCTTCACCCGCAATGCTGCATCTGCAAGGTCTGAGGCCCTTTAGACACCCCTTGGCTATGGTGCC  
 CGTTAAACAGACGATTTACTCTCCTGTTAATAGGATTCAATTACGAAAAGGGGTGGGGGAAGGGAGCTCACTGCTGGGGAGA  
 GTTTAGGGCCTGAGCACTGCTCTCGTTTTATGGCCGATAAGCTGGTTGCCTCATAGCAACAGAGGCAGAAGTGAGGAGGG  
 TCCAGAACTCTTACAGTTGGCAGGGCTGAGCTGTGCCACCTCCCCAGGAGCTCTAAAATATCAAGTGGCGAGTGTCTGCACA  
 ACAGAAGTGAGCTTTCAGGTCTTAAAGCAGCACCAGGCTCAGGAGAGAGAGCCAGGCTCAGCAGAGAGAGCCCCAGCTCTG  
**Ap1**<sub>-1197</sub> TAATCTGGCAGGACCCGCTTTGAGCGCTGGCTCCTGCACTTGGGGAACCCCCAGTGGCTCAGTGGTGAAGAGTCCGCCTGCCA  
 GTGCAAGAGACCTGGGTTCTGTCCCTGAGTCGGGGAGTCCCTCTGGAATAGGAAATGGCAGCCCACTCCAGTATTCTTGCCTG  
 GAGAATCCCATGGACAGAGGAGCCTGGCGGGCTACAGTCCACGGGGTGCAGAGAGTTCGGATGCGACTGAGCGCGCACGCG  
 CATGCATGCATCCATGCAGCCCCGCTTAGAGCAGCCAATGTGGGAGAGCAATTTAAGGCTTCTGAGCTTCAGATTCAAGTTT  
**Ap1**<sub>-879</sub> CTTCAACTGACCGTTGAGTAAACTGAGGAGCAGAGACGCTAGGATCATTCTGATACTTAGGGAAGGCCCTATGCTCGTGTTT  
 ATTTTTGTCACTGCTTTTTAATCCTTCCAACAACCACTTTAAGGATGAAAGAGTAGAGAGAAGTTATGTTTTTGCCTTCAAATG  
 TTATTTCTCACTTGTCTTCTATTGATGGGAACAAATCTCTGCCATGCGCCAAACTGTACAGTTTGACCA**CGGGAGGTCA** **Ap1**<sub>-652</sub>  
 CTGGGCCAAGCAGGCTTCTTATAGATCTGGCCAGCTGGAACAGCCGTGAAGCTCTCACTGCTGCCCGCTTCTCCTTGGTTGG  
 TCTTTAAAAGGTGAGTTTCTTTTTCTGCCCCAAATCTCCGCCATTTCTAACTCTTATCACTACTCTGTACAAAGTAAGGTTTA  
 AAAACCCCAAGAGGCTCAGAGAGGCATCGTGACCTGCCTGGGGTACACAGTACACAGTTGTCAAAGGCTGAGGGTTTTGGC  
**Sp1**<sub>-380</sub> TGCTGGGCGGGTTGGAAATGCCAGCCCCCTCCAGCTGCTGATGAGCCCCACCCCTTAGAGCTTCCACTCCTCCTCCCTCCCTCC  
 GTCAGCAAAAAGAACTCATTTCATCCAGACTTCTCTGCCAGCCAGAGATTAAGTGAAGAAGAAATGTCTCCAAAC  
 ATACCGAGATGGTCTTTCCTGGCTTCTCAGATTTGCTGTCTGTGGTTTGAACCTTTTGGCCAGTAGATTCTGGGAATTGCAGG  
 GCAGGGCCTGGGTAACAGCTGCCAGCCCCCTGGGCTGGGTACCTGCCCTCTCGAGTTTGTGTCTGGGGCTGTGTGCTCAGAC  
 TTGACCATGTTTGGGCATGGAGGCTCGTCTCAGACGAGAACCAAAGGCCGCT  
 mRNA of BKβ1  
 TCCCCAGAGACGGGCTGGGAGCCCAA**ACTTCTGCTGCAGCTCGGGCAGCTTCTTTTGGGTGGGGGCTGGGGACCAG**  
**GAAGAAAAGGTCTGCCGAAG AAGCTT**

**Figure S1. Mapping of the ovine BKβ1 promoter sequence and transcription factor binding sites.** Transcription factor consensus binding sites, including Ap1 and Sp1 binding sites were underlined and CpG units were marked bold. Arrow, transcription start site.

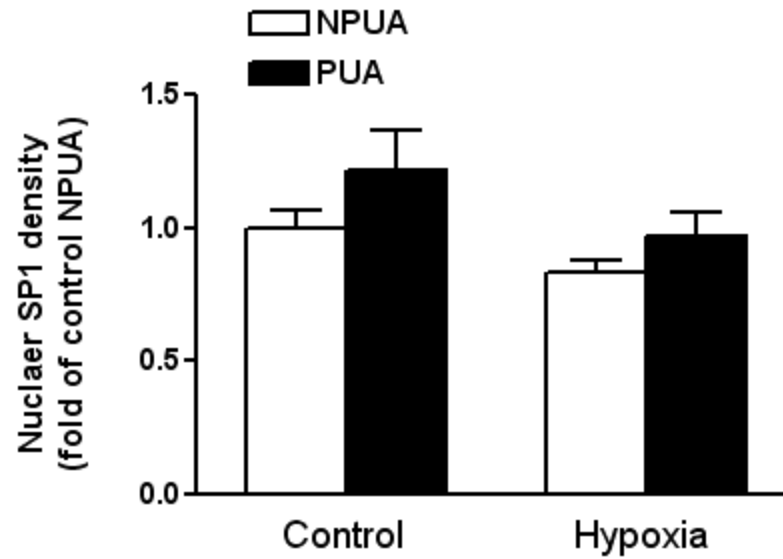

**Figure S2. Effect of pregnancy and chronic hypoxia on Sp1 abundance in nuclear extracts.** Nuclear extracts were isolated from uterine arteries of nonpregnant (NPUA) and pregnant (PUA) sheep treated with normoxia (Control) and long-term high-altitude hypoxia (Hypoxia). Sp1 abundance was determined by Western blot assay. Data are means  $\pm$  SEM. n = 5
